# Supplementary material
Source: PubMed Central journal article supplement (PMC4615264)
Supplement: NIHMS683582-supplement-01.pdf [file NIHMS683582-supplement-01.pdf]

Supplementary Table 1.

| Gene 1 MAF = 0.5 | Interaction beta |        |        |        |
|------------------|------------------|--------|--------|--------|
| Gene 2 MAF       | 0.2              | 0.15   | 0.1    | 0.05   |
| 0.05             | 0.1435           | 0.0373 | 0.0063 | 0.0007 |
| 0.10             | 0.5140           | 0.1675 | 0.0253 | 0.0016 |
| 0.20             | 0.9217           | 0.5216 | 0.0992 | 0.0045 |
| 0.30             | 0.9880           | 0.7473 | 0.1872 | 0.0079 |
| 0.40             | 0.9970           | 0.8441 | 0.2523 | 0.0105 |
